# Supplementary material for: Convolutional Neural Network-Based Artificial Intelligence for Classification of Protein Localization Patterns
Source: MDPI journal article supplement (doi:10.3390/biom11020264), 2021-02-11
Supplement: s1 [file s1]

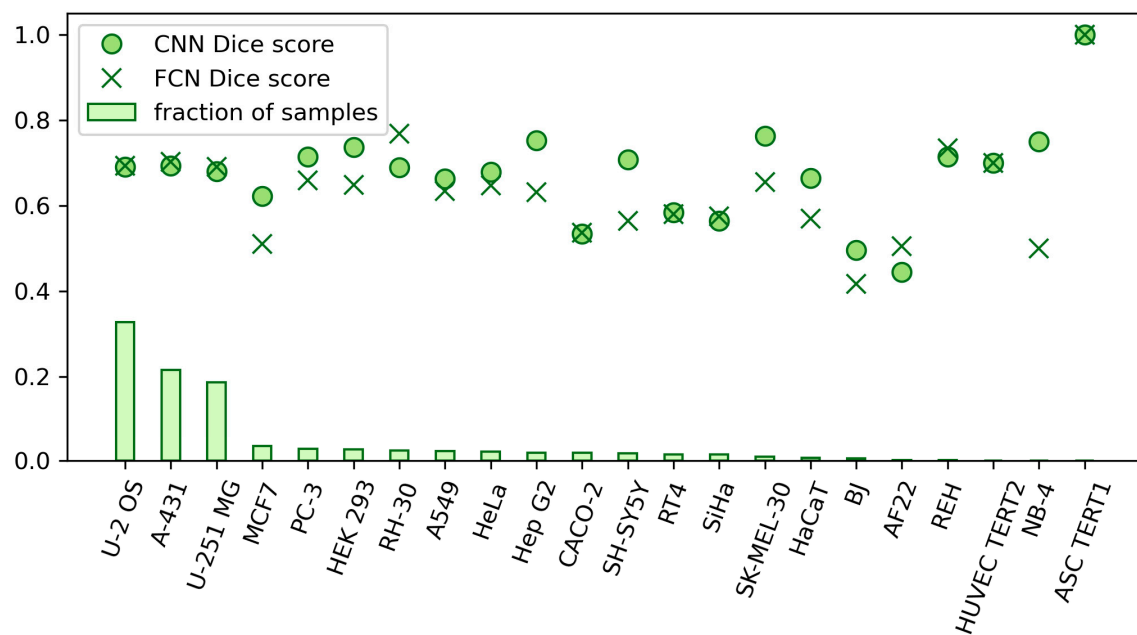

Figure S1
